# Supplementary material for: The role of PMA in enhancing the surface acidity and catalytic activity of a bimetallic Cr–Mg-MOF and its applications for synthesis of coumarin and dihydropyrimidinone derivatives
Source: Royal Society of Chemistry journal article supplement (doi:10.1039/d0ra03591b), 2020-01-01
Supplement: d0ra03591b1.pdf [file d0ra03591b1.pdf]

## **The role of PMA in enhancing the surface acidity and catalytic activity of bimetallic Cr-Mg-MOF and its applications for synthesis of coumarin and dihydropyrimidinone derivatives**

**Reda S. Salama <sup>a,\*</sup>, Shawky M. Hassan <sup>b</sup>, Awad I. Ahmed <sup>b</sup>, W. S. Abo El-Yazeed <sup>b,c</sup>, and Mohammed A. Mannaa <sup>d,\*</sup>**

<sup>a</sup> Basic Science Department, Faculty of Engineering, Delta University for Science and Technology, Gamasa, Egypt.

<sup>b</sup> Chemistry Department, Faculty of Science, Mansoura University, Mansoura, Egypt.

<sup>c</sup> Chemistry Department, College of Sciences and Humanities in Al-Kharj, Prince

Sattam Bin Abdulaziz University, Al-Kharj 11942, Saudi Arabia

<sup>d</sup> Chemistry Department, Faculty of Science, Amran University, Yemen.

\* Corresponding author at: Basic Science Department, Faculty of Engineering, Delta University for Science and Technology, Gamasa, Egypt, Tel.: 00201061391656.

\* Corresponding author at: Chemistry Department, Faculty of Science, Amran University, Yemen. Tel.: 00967714152023.

E-mail address: [reda.salama@deltauniv.edu.eg](mailto:reda.salama@deltauniv.edu.eg), [dr.reda.salama@gmail.com](mailto:dr.reda.salama@gmail.com) (R. S. Salama), [mnnaam@yahoo.com](mailto:mnnaam@yahoo.com) (M.A.Mannaa).

**Table 1S†:** Comparison study for synthesis of 7-hydroxy-4-methylcoumarin in presence of Cr-Mg-MOF and wt. % PMA/ Cr-Mg-MOF with other catalysts reported in the literature

| Entry | Catalyst               | Conditions                        | Yield (%) | Ref.        |
|-------|------------------------|-----------------------------------|-----------|-------------|
| 1     | Without catalyst       | Free solvent, Reflux, 120° C, 6hr | Nil       | Recent work |
|       | Cr-Mg-MOF              | Free solvent, Reflux, 120° C, 2hr | Traces    | Recent work |
| 2     | 75 wt.% PMA/ Cr-Mg-MOF | Free solvent, Reflux, 120° C, 2hr | 68.7 %    | Recent work |
| 3     | HKUST-1                | Free solvent, Reflux, 120° C, 2hr | 2.0 %     | [48]        |
| 4     | Sulfamic acid@ HKUST-1 | Free solvent, Reflux, 120° C, 2hr | 59.0%     | [48]        |
| 5     | MIL-101 (Cr)           | Free solvent, Reflux, 120° C, 2hr | Traces    | [31]        |
| 6     | Amberlyst-15           | Free solvent, 150° C, 2hr         | 72.0%     | [49]        |
| 7     | W/ZrO <sub>2</sub>     | Toluene, 150° C, 6hr              | 80.0%     | [50]        |

**Table 2S†:** Comparison study for synthesis of 7-hydroxy-4-methylcoumarin in presence of Cr-Mg-MOF and wt. % PMA/ Cr-Mg-MOF with other catalysts reported in the literature

| Entry | Catalyst                | Conditions                          | Yield (%) | Ref.        |
|-------|-------------------------|-------------------------------------|-----------|-------------|
| 1     | Without catalyst        | Free solvent, Reflux, 100° C, 6hr   | Traces    | Recent work |
|       | Cr-Mg-MOF               | Free solvent, Reflux, 100° C, 1.5hr | 21.2 %    | Recent work |
| 2     | 75 wt.% PMA/ Cr-Mg-MOF  | Free solvent, Reflux, 100° C, 1.5hr | 96.1 %    | Recent work |
| 3     | HKUST-1                 | Free solvent, Reflux, 80° C, 2hr    | 35.0 %    | [48]        |
| 4     | Sulfamic acid@ HKUST-1  | Free solvent, Reflux, 80° C, 2hr    | 89.0%     | [48]        |
| 5     | cellulose sulfuric acid | CH <sub>2</sub> Cl <sub>2</sub>     | 68.0 %    | [56]        |
| 6     | silica sulfuric acid    | Solvent, 100° C                     | 91.0 %    | [56]        |
| 7     | AlCl <sub>3</sub>       | Solvent free, 8–10hr                | 40.0 %    | [57]        |
